# Supplementary material
Source: publisher figshare collection journal article supplement (https://aacr.figshare.com/articles/dataset/_/22403474)

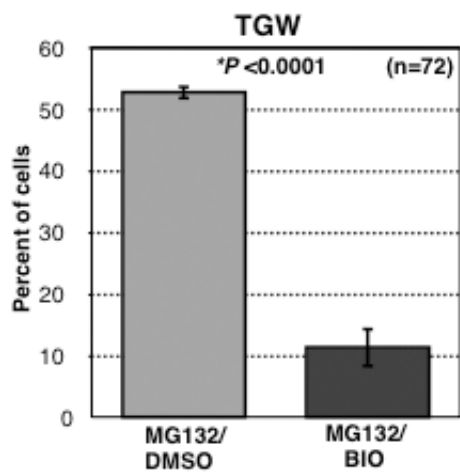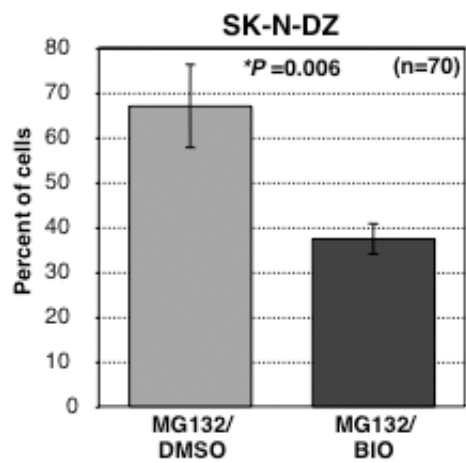

**Supplementary Fig.S4**

Supplement: Supplementary file 1 [file 39849281]
